# Supplementary material for: Examination of Genetic Variants Revealed from a Rat Model of Brain Ischemia in Patients with Ischemic Stroke: A Pilot Study
Source: MDPI journal article supplement (doi:10.3390/genes12121938), 2021-11-30
Supplement: s1 [file s1]

**Table S2.** Frequency of genotypes in patients and controls among men and women.

| SNP        | Gene   | Genotype | Men*      |            | P      | Women*    |            | P        |
|------------|--------|----------|-----------|------------|--------|-----------|------------|----------|
|            |        |          | Controls  | Patients   |        | Controls  | Patients   |          |
| rs62278647 | PTX3   | TT       | 0.28 (31) | 0.24 (39)  | 0.1220 | 0.28 (32) | 0.22 (37)  | 0.000057 |
|            |        | AT       | 0.46 (50) | 0.58 (96)  |        | 0.39 (44) | 0.64 (105) |          |
|            |        | AA       | 0.20 (28) | 0.18 (30)  |        | 0.33 (37) | 0.14 (23)  |          |
| rs2316710  | PTX3   | CC       | 0.21 (23) | 0.16 (27)  | 0.5637 | 0.29 (33) | 0.12 (20)  | 0.00077  |
|            |        | CA       | 0.48 (52) | 0.53 (87)  |        | 0.42 (47) | 0.59 (98)  |          |
|            |        | AA       | 0.31 (34) | 0.30 (50)  |        | 0.29 (33) | 0.28 (47)  |          |
| rs7634847  | PTX3   | CC       | 0.41 (45) | 0.37 (61)  | 0.5257 | 0.42 (47) | 0.44 (72)  | 0.0616   |
|            |        | CT       | 0.44 (48) | 0.51 (84)  |        | 0.40 (45) | 0.47 (78)  |          |
|            |        | TT       | 0.15 (16) | 0.12 (20)  |        | 0.19 (21) | 0.09 (15)  |          |
| rs1877822  | RGS9   | AA       | 0.56 (61) | 0.67 (112) | 0.1332 | 0.70 (79) | 0.65 (108) | 0.7047   |
|            |        | GA       | 0.39 (43) | 0.30 (50)  |        | 0.27 (31) | 0.32 (53)  |          |
|            |        | GG       | 0.05 (5)  | 0.02 (4)   |        | 0.03 (3)  | 0.02 (4)   |          |
| rs74063268 | EMP1   | TT       | 0.82 (89) | 0.86 (142) | 0.3654 | 0.81 (92) | 0.84 (138) | 0.1578   |
|            |        | CT       | 0.17 (19) | 0.14 (24)  |        | 0.19 (21) | 0.14 (23)  |          |
|            |        | CC       | 0.01 (1)  | 0.00 (0)   |        | 0.00 (0)  | 0.02 (4)   |          |
| rs2569192  | CD14   | CC       | 0.47 (51) | 0.44 (72)  | 0.7370 | 0.52 (59) | 0.48 (79)  | 0.8151   |
|            |        | CG       | 0.50 (54) | 0.51 (84)  |        | 0.40 (45) | 0.44 (71)  |          |
|            |        | GG       | 0.04 (4)  | 0.05 (9)   |        | 0.08 (9)  | 0.08 (13)  |          |
| rs66782529 | LGALS3 | CC       | 0.45 (49) | 0.47 (77)  | 0.8661 | 0.49 (55) | 0.52 (85)  | 0.4748   |
|            |        | TC       | 0.44 (48) | 0.44 (73)  |        | 0.44 (50) | 0.38 (63)  |          |
|            |        | TT       | 0.11 (12) | 0.09 (15)  |        | 0.07 (8)  | 0.10 (17)  |          |
| rs1009977  | LGALS3 | TT       | 0.34 (37) | 0.35 (58)  | 0.8978 | 0.42 (48) | 0.40 (66)  | 0.5016   |
|            |        | GT       | 0.50 (54) | 0.51 (84)  |        | 0.45 (51) | 0.42 (70)  |          |
|            |        | GG       | 0.17 (18) | 0.14 (24)  |        | 0.12 (14) | 0.18 (29)  |          |
| rs1491961  | CCR1   | CC       | 0.52 (57) | 0.41 (68)  | 0.1042 | 0.52 (58) | 0.47 (78)  | 0.5903   |
|            |        | CT       | 0.42 (46) | 0.48 (80)  |        | 0.41 (46) | 0.44 (72)  |          |
|            |        | TT       | 0.06 (6)  | 0.11 (18)  |        | 0.06 (7)  | 0.09 (15)  |          |

\*Numbers in squares are the numbers of individuals with particular genotypes.
