# Supplementary figures and images for: Examination of Genetic Variants Revealed from a Rat Model of Brain Ischemia in Patients with Ischemic Stroke: A Pilot Study
Source: MDPI journal article supplement (doi:10.3390/genes12121938), 2021-11-30

rs2316710\_A

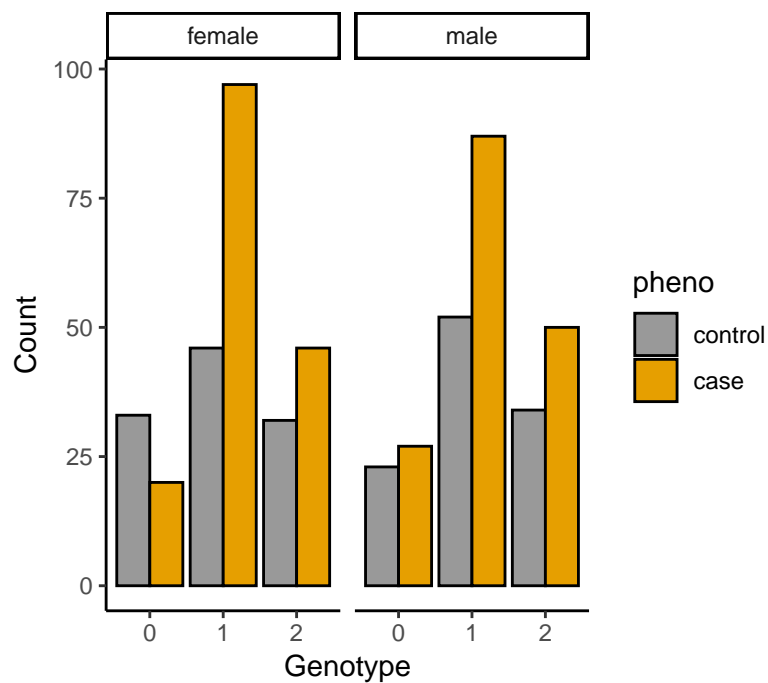

rs1877822\_A

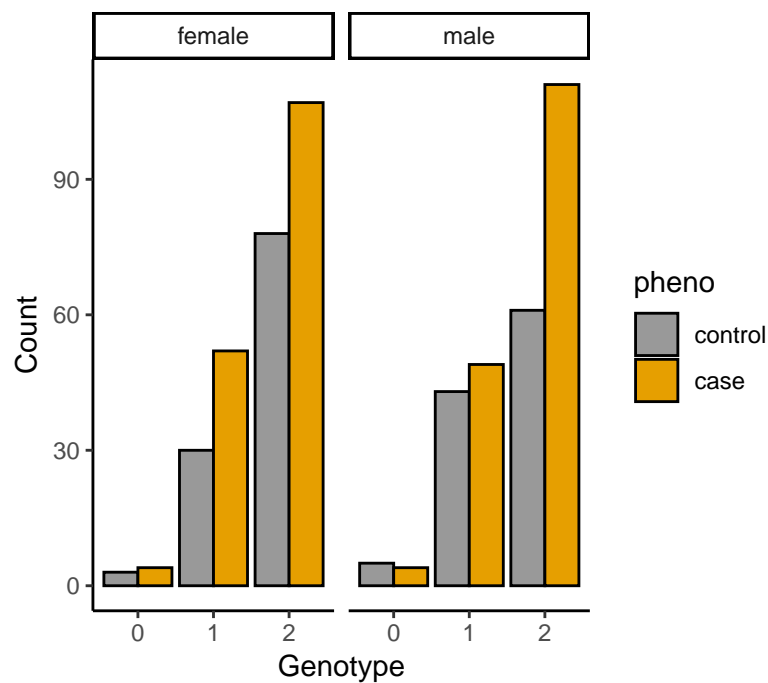

rs7634847\_C

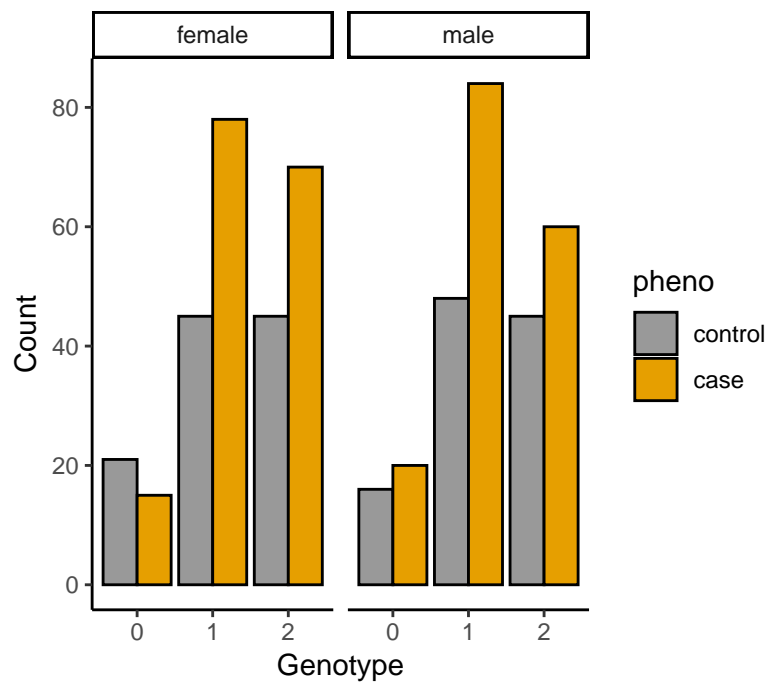

rs74063268\_T

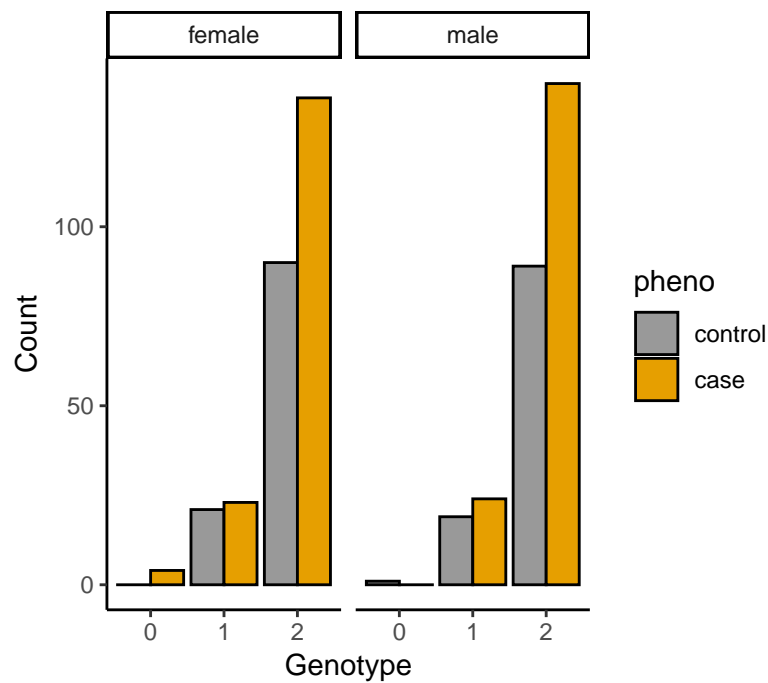

rs62278647\_T

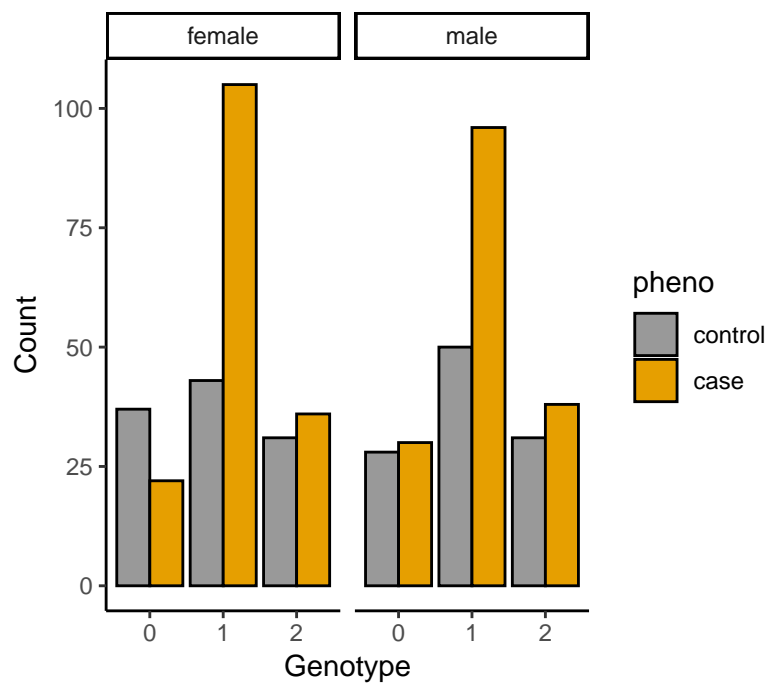

rs2569192\_C

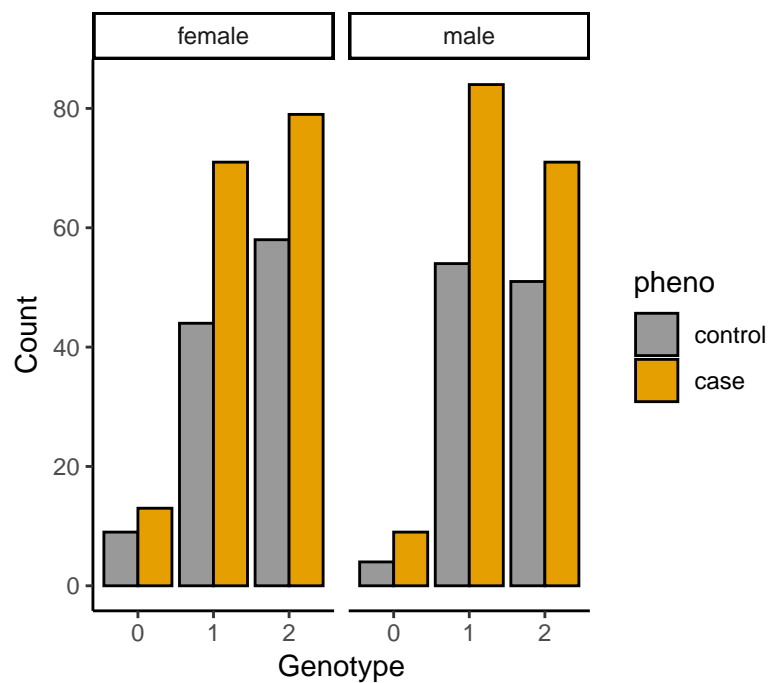

rs66782529\_C

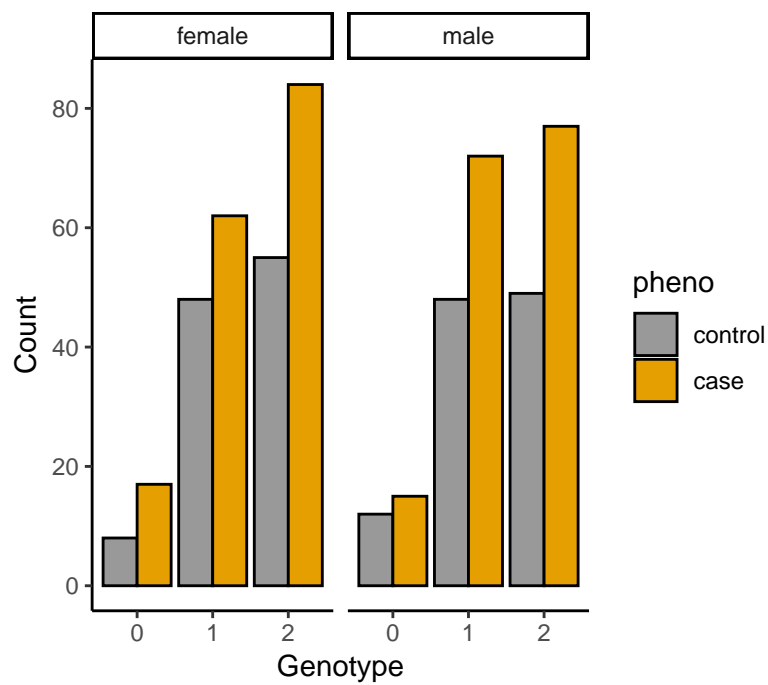

rs1491961\_C

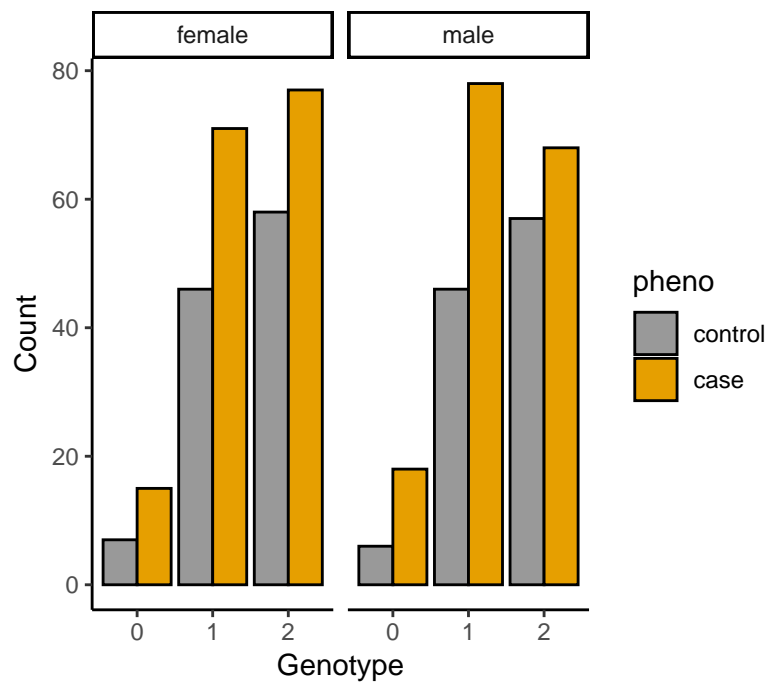

rs1009977\_T

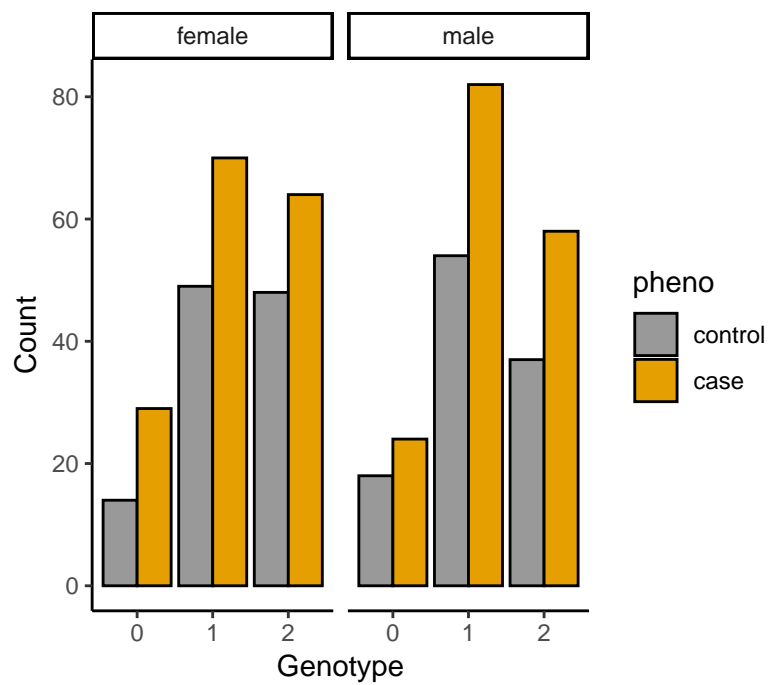

Supplement: s1 [file s1]
